# Supplementary material for: MIF -173G/C (rs755622) polymorphism modulates coronary artery disease risk: evidence from a systematic meta-analysis
Source: Springer Nature journal article supplement (doi:10.1186/s12872-020-01564-4), 2020-06-19
Supplement: MOESM1 [file 18101606]

**Supplementary Table S1.** Scale for Methodological Quality Assessment

| Criteria                                                           | Score |
|--------------------------------------------------------------------|-------|
| 1. Representativeness of cases                                     |       |
| CAD diagnosed according to acknowledged criteria                   | 2     |
| Mentioned the diagnosed criteria but not specifically described    | 1     |
| Not mentioned                                                      | 0     |
| 2. Source of controls                                              |       |
| Population or community based                                      | 3     |
| Hospital-based CAD-free controls                                   | 2     |
| Healthy volunteers without total description                       | 1     |
| CAD-free controls with related diseases                            | 0.5   |
| Not described                                                      | 0     |
| 3. Sample size                                                     |       |
| >300                                                               | 2     |
| 200–300                                                            | 1     |
| <200                                                               | 0     |
| 4. Quality control of genotyping methods                           |       |
| Repetition of partial/total tested samples with a different method | 2     |
| Repetition of partial/total tested samples with the same method    | 1     |
| Not described                                                      | 0     |
| 5. HWE                                                             |       |
| HWE in control subjects                                            | 2     |
| Hardy–Weinberg disequilibrium in control subjects                  | 1     |

**CAD coronary artery disease, HWE Hardy–Weinberg equilibrium.**
